1 **Vigorous exercise associates with the abundance of gut bacterial species reflecting energy**  
2 **pathways: an epidemiological cross-sectional analysis within the Lifelines Dutch Microbiome**  
3 **Project**

4

5 Jordi Morwani-Mangnani<sup>1</sup>, Quinten R. Ducarmon<sup>2,3</sup>, Georg Zeller<sup>2,3,4</sup>, Joris Deelen<sup>5,6</sup>, Marian  
6 Beekman<sup>1</sup>, P. Eline Slagboom<sup>1</sup>

7

8 <sup>1</sup>Section of Molecular Epidemiology, Department of Biomedical Data Sciences, Leiden University  
9 Medical Center, Leiden, Netherlands

10 <sup>2</sup>Structural and Computational Biology Unit, European Molecular Biology Laboratory (EMBL),  
11 Heidelberg, Germany.

12 <sup>3</sup>Leiden University Center for Infectious Diseases (LUCID), Leiden University Medical Center, Leiden,  
13 Netherlands.

14 <sup>4</sup>Center for Microbiome Analyses and Therapeutics (CMAT), Leiden University Medical Center,  
15 Leiden, Netherlands.

16 <sup>5</sup>Max Planck Institute for Biology of Ageing, 50931 Cologne, Germany

17 <sup>6</sup>Cologne Excellence Cluster on Cellular Stress Responses in Ageing-Associated Diseases (CECAD),  
18 University of Cologne, 50931 Cologne, Germany

## 19 ABSTRACT

20 **Background:** Regular physical activity (PA) is vital for proper organ functions including the gut.  
21 Despite existing research, it remains unclear how the gut microbiome is affected by different intensities  
22 of PA, and how other lifestyle factors influence this relationship. Here we study the relation between  
23 PA intensity and gut microbiome composition and function in a large Lifelines Dutch Microbiome  
24 Project dataset.

25 **Methods:** A cross-sectional design was performed on 5409 adults aged 40 to 60 from the community-  
26 based Lifelines Dutch Microbiome Project and from all these participants metagenomic shotgun data  
27 was available. Participants were categorized into sedentary (N=2501), moderate (N=1915), and  
28 vigorous (N=993) PA groups, based on self-reported activity levels. We investigated association  
29 between PA intensity and microbial diversity, bacterial species, and metabolic pathways by multiple  
30 regression models sequentially adjusted for the covariates age/sex, BMI, stool consistency and diet  
31 quality/alcohol intake.

32 **Results:** Vigorous PA, but not moderate PA, was significantly associated with higher gut microbiome  
33 alpha diversity (i.e., species richness, Shannon diversity, and Simpson diversity) as compared to  
34 sedentary PA. Compared to the sedentary group, the vigorous PA group showed a lower abundance of  
35 the bacterial species *Lawsonibacter asaccharolyticus* ( $\beta = -0.003$ ,  $p = 0.042$ ), even after extensive  
36 covariate adjustments and correction for multiple testing. Other species were initially also significantly  
37 associated with vigorous PA, but they disappeared after adjusting for covariates resulting in a loss of  
38 significance. Pathway analysis showed significant enrichment of two distinct metabolic pathways  
39 related to cellular energy recycling (*Pyruvate fermentation to acetate and lactate II*,  $\beta = 8.11 \times 10^{-05}$ ,  $p =$   
40  $0.035$ ) and purine metabolism (*Purine ribonucleosides degradation*,  $\beta = 3.36 \times 10^{-04}$ ,  $p = 0.039$ ) in  
41 participants engaging in vigorous PA as compared to sedentary PA.

42 **Conclusions:** Vigorous PA is associated with higher gut microbiome diversity and with specific  
43 alterations of microbial composition. The lower abundance of *Lawsonibacter asaccharolyticus* within  
44 the vigorous PA group may be linked to increased gut permeability. The identified enrichment of  
45 microbial fermentation and purine metabolism in vigorous PA hints at a potential role of PA in affecting  
46 gut microbiome functionality and host health. The results of our modeling strategy highlight the  
47 importance of adjusting for dietary covariates to understand how PA may impact the gut microbiome  
48 independently from other influences.

49

50 **KEYWORDS:** Physical activity, gut microbiome, microbial diversity, metagenomics, bacterial  
51 abundance, metabolic pathways

52

53 **ABBREVIATIONS**

|               |                                                                  |
|---------------|------------------------------------------------------------------|
| <b>PA</b>     | Physical Activity                                                |
| <b>DMP</b>    | Dutch Microbiome Project                                         |
| <b>WHO</b>    | World Health Organization                                        |
| <b>SQUASH</b> | Short QUestionnaire to ASsess Health enhancing physical activity |
| <b>FFQ</b>    | Food Frequency Questionnaire                                     |

54

55

## 56 INTRODUCTION

57 Physical activity (PA) provides a range of benefits including better cardiovascular health, improved  
58 physical functioning, and enhanced mental health (1–5). PA exerts its health-promoting functions on  
59 e.g., lung capacity, circulation, muscle mass, and strength. Furthermore, PA likely influences the gut  
60 microbiome, a diverse community of microorganisms crucial for digestion, nutrient metabolism,  
61 immune function, and intercellular communication with the central nervous system. (6–9). Given the  
62 important role of the gut microbiome in host health, understanding how PA modulates can offer  
63 valuable insights for optimizing health and preventing disease.

64 A healthy gut microbiome may be defined by characteristics such as high microbial diversity and a  
65 large relative abundance of commensal bacteria. However, more quantitative definitions are still subject  
66 to intense research. Current research supports the notion that PA promotes a healthy gut microbiome  
67 (6,10). It has, however, not been thoroughly investigated which type of PA changes the relative  
68 abundance of specific bacterial species and microbial pathways. Given that the WHO guidelines  
69 recommend at least 150 minutes of moderate activity per week and at least 75 minutes of vigorous  
70 activity per week, studying the impact of meeting these criteria on gut microbiome is particularly  
71 relevant. These levels include sedentary (not meeting guidelines), moderate activity (at least 150  
72 minutes of moderate activity per week), and vigorous activity (at least 75 minutes of vigorous activity  
73 per week) (11–14). Noteworthy, previous studies in this area often do not extensively adjust for  
74 lifestyle covariates in the relationship between PA and gut microbial health, underscoring the need for  
75 a more nuanced exploration of this relationship.

76 Beyond PA, an array of factors influences gut microbial composition and function. For example, plant-  
77 based diets rich in fibers nourish specific commensal bacteria and enhance the production of host-  
78 health-promoting metabolites such as short-chain fatty acids (15–17). Similarly, healthier stool  
79 consistency, reflecting optimal gut transit time and microbial activity, correlates with a more balanced  
80 and diverse microbiome (18). Conversely, factors such as older age and higher BMI, alcohol intake,  
81 and medication use are associated with a decline in gut microbial diversity and gut health (19–21). Age-  
82 related gut microbiome changes are associated with immunosenescence and inflammaging – low-grade  
83 chronic inflammation leading to defective innate immune function, both of which contribute to age-  
84 related diseases (19,22). In addition, higher BMI has been associated with less diverse microbiota and  
85 with profiles linked to obesity-related risks (20,23). Alcohol intake disrupts microbial communities,  
86 compromising intestinal health and immune function (21). While biological sex differences have  
87 minimal impact on the gut microbial profiles, differences across genders in lifestyle and behaviors may  
88 still modulate gut microbial health (20,24). Given these varied influences on the gut microbiome, it is  
89 imperative to understand how PA may impact gut microbial health independently of these known  
90 covariates.

91 The present study aimed to understand the relationship between different intensity levels of PA and the  
92 gut microbiome, specifically via microbial alpha diversity, taxonomic species abundance, and microbial  
93 pathway abundance. We sequentially accounted for covariates including age, sex, BMI, Bristol stool  
94 scale, sequencing read depth, stool consistency, Lifelines Diet Score, daily caloric intake, and alcohol  
95 intake. By leveraging the globally unique dataset of the Lifelines Dutch Microbiome Project (DMP),  
96 we focused on how higher PA intensities and known covariates influence human health through its  
97 modulation of gut microbial composition and function.

98

## 99    **METHODS**

100

### 101    **STUDY DESIGN**

102

103    The DMP cohort expands the Lifelines cohort study, a comprehensive and long-term population-based  
104    research initiative (25). Lifelines utilizes a distinctive three-generation approach to investigate the  
105    health and health-related behaviors of 167,729 residents of the Netherlands. This study encompasses a  
106    wide range of factors that influence health and disease. The Lifelines Cohort Study is conducted  
107    according to the principles of the Declaration of Helsinki and per research code UMCG and is approved  
108    by the medical ethical committee of the University Medical Center Groningen, The Netherlands.

109

110    For the DMP sub-cohort of the Lifelines cohort study, fresh-frozen fecal and blood samples were  
111    obtained from Lifelines participants between 2015 and 2016. Whole-genome shotgun sequencing was  
112    conducted on portions of 8208 fecal samples for further analysis (26). Participant metadata was grouped  
113    into anthropometrics, dietary habits, PA behaviors, diseases, and medication use (27).

114

### 115    **STUDY PROCEDURES**

116

#### 117    **Fecal sample collection, DNA extraction, and sequencing**

118

119    Participants collected and froze fecal samples at home within 15 minutes. Lifelines staff transported  
120    these samples on dry ice to a biorepository, where they were stored at -80°C. DNA was extracted using  
121    the QIAamp Fast DNA Stool Mini Kit (Qiagen) and QIAcube (Qiagen). Sequencing was done at  
122    Novogene, China, on the Illumina HiSeq 2000 platform, generating around 8 Gb of 150 bp paired-end  
123    reads per sample (26).

124

#### 125    **Profiling microbiome composition and function**

126

127    Metagenomes were analyzed as previously described (26). KneadData tools (v0.5.1) trimmed reads to  
128    PHRED quality 30 and removed Illumina adapters; Bowtie2 (v2.3.4.1) removed human genome-aligned  
129    reads. Taxonomic composition was assessed using MetaPhlan2 (v2.7.2), and microbial pathways were  
130    profiled with HUMAnN2 (v0.11.1) (28).

131

#### 132    **Measurement of Bacterial species and functional pathways.**

133

134 A total of 8208 participants were initially enrolled, from which 5409 individuals (2223 men and 3186  
135 women) between the ages of 20 and 83 year that did not use antibiotics three months prior to stool  
136 provision had a complete dataset (FIGURE 1). Stool samples were collected for metagenomic  
137 sequencing, analyzing 167 bacterial species and 278 functional pathways. Abundance data was  
138 logarithmically transformed to base 10 (Log10), with a pseudocount added as needed. Further details  
139 on the protocol are specified in a previous study (28). The MetaCyc encyclopedic database was  
140 employed to identify metabolic pathways and enzymes, identifying organism-level specific pathways  
141 (29).

142

143 Variables of interest

144

145 PA levels were assessed using the widely utilized SQUASH questionnaire, which is recognized  
146 nationally for its comprehensive evaluation of PA in the Dutch population. Participants were  
147 categorized as sedentary (not meeting WHO guidelines of at least 150 minutes of moderate activity or  
148 75 minutes of vigorous activity per week), moderately active (meeting WHO moderate activity  
149 recommendations and engaging more minutes per week in moderate activity than vigorous activity), or  
150 vigorously active (meeting WHO vigorous activity recommendations and engaging more minutes per  
151 week in vigorous activity than moderate activity).

152

153 Demographic variables (i.e., age and sex), traditional covariates (i.e., BMI), gut-related covariates (i.e.  
154 Bristol Stool Scale mean taken as the average seven-day score before stool provision, and sequencing  
155 read depth), and dietary variables (alcohol intake, Lifelines Diet Score as a proxy of healthiness of a  
156 diet, caloric intake) were obtained through questionnaires and physical measurements. More details  
157 about these variables are provided in TABLE S1.

158

159 STATISTICAL ANALYSIS

160

161 To investigate the associations between PA and microbiome diversity, we conducted multiple  
162 regression analyses with microbiome alpha diversity metrics (species richness, Shannon index, Simpson  
163 index) as the outcomes, and PA levels (moderate and vigorous compared to sedentary) as the  
164 determinants. These analyses were adjusted for confounding factors including age, sex, BMI, Bristol  
165 stool scale, sequencing read depth, stool consistency, Lifelines Diet Score, daily caloric intake, and  
166 alcohol intake. Additionally, we explored the effects of vigorous PA on bacterial species abundance  
167 and functional pathways through sequential adjustments in multiple linear regression models. These  
168 models assessed abundance/pathways as outcomes with vigorous PA as the determinant, starting with  
169 an unadjusted model (Model 0), followed by adjustments for age and sex (Model 1), BMI (Model 2),  
170 Bristol stool consistency (Model 3), Lifelines Diet Score and caloric intake (Model 4), and alcohol

171 intake (Model 5). Given the study's exploratory nature, False-Discovery Rate (FDR) correction was  
172 applied at significance thresholds of  $p < 0.05$  and  $p < 0.10$  for species and functional pathway  
173 abundance. All statistical analyses were conducted using R version 4.2.4 and RStudio version 2023.12.1  
174 using the “vegan” package for gut microbiome-specific analyses.



## 175 RESULTS

176

### 177 BASELINE CHARACTERISTICS

178

179 The present study is based on PA levels and gut metagenomics data measured in the Lifelines DMP  
180 sub-cohort (26). The study categorized participants based on their PA levels into three groups according  
181 to WHO recommendations: sedentary (N=2501), moderate (N=1915), and vigorous (N=993), totaling  
182 5409 individuals with a complete data set and no antibiotic use (FIGURE 1, TABLE 1). PA levels were  
183 a defining characteristic of the groups which varied in moderate and vigorous activity. The sedentary  
184 group averaged  $0.27 \pm 0.66$  hours per week of vigorous activity and  $0.92 \pm 0.89$  hours of moderate  
185 activity. The moderate activity group averaged  $0.98 \pm 1.92$  hours per week of vigorous activity and  
186  $11.61 \pm 11.35$  hours of moderate activity. In contrast, the vigorous activity group reported a significantly  
187 higher average of  $4.92 \pm 3.31$  hours per week of vigorous activity and  $1.25 \pm 1.64$  hours of moderate  
188 activity. This significant variation in PA levels ( $p < 2.2 \times 10^{-16}$ ) highlights the defining characteristics of  
189 each group, with the vigorous activity group showing a markedly higher level of engagement in  
190 vigorous activity compared to both the sedentary and moderate activity groups.

191

192 The analysis of PA levels revealed distinct patterns among the groups. The sedentary group, with an  
193 average age of  $50.98 \pm 11.10$  years and the highest BMI of  $26.32 \pm 4.20$ , had the lowest calorie intake  
194 ( $2027.91 \pm 592.25$  kCal/day) and the lowest diet quality, as indicated by the Lifelines Diet Score ( $24.30$   
195  $\pm 5.73$ ) (TABLE 1)). In contrast, the moderate activity group, which was older  $52.75 \pm 11.25$  years and  
196 a had a BMI of  $25.96 \pm 3.93$ , had higher caloric intake ( $2053.95 \pm 598.42$  kCal/day) and better diet  
197 quality (Lifelines Diet Score  $25.19 \pm 5.86$ ). The vigorous activity group, being the youngest with  $48.94$   
198  $\pm 11.46$  years and having the lowest BMI of  $25.05 \pm 3.60$ , reported the highest calorie intake ( $2086.57$   
199  $\pm 579.89$  kCal/day) and the highest diet quality (Lifelines Diet Score  $25.14 \pm 6.01$ ). Significant  
200 differences were observed across PA levels for age, BMI, calorie intake, and diet quality (all  $p < 0.05$ ),  
201 with no significant variation in stool consistency ( $p = 0.0923$ ) or alcohol intake ( $p = 0.0823$ ).

202

### 203 VIGOROUS PA IS ASSOCIATED WITH HIGHER GUT MICROBIAL ALPHA DIVERSITY

204

205 To explore the relationship between gut microbial diversity and PA levels, we assessed these  
206 associations in a linear model accounting for various factors, including age, sex, BMI, Bristol Mean,  
207 calorie intake, Lifelines Diet Score, and alcohol intake (corresponding to Model 5 in the Methods  
208 section). The results, depicted in TABLE 2, indicate that only vigorous activity was significantly  
209 associated with higher alpha diversity indices. Specifically, vigorous activity was positively correlated  
210 with species richness ( $\beta = 3.20$ ,  $p = 7.80 \times 10^{-5}$ ), Shannon diversity ( $\beta = 0.0320$ ,  $p = 0.015$ ), and Simpson

211 diversity ( $\beta = 0.002$ ,  $p = 0.024$ ), even after correction for the full set of covariates (TABLES S2, S3,  
212 S4, respectively). In contrast, moderate activity exhibited twice the effect size for these diversity  
213 parameters, but none of these associations reached statistical significance.

214

## 215 VIGOROUS PA IS ASSOCIATED WITH BACTERIAL SPECIES RELATIVE ABUNDANCE

216

217 We next examined the associations between the relative abundance of gut microbial species and the  
218 levels of vigorous PA compared to the sedentary group. We employed multiple regression models to  
219 explore the effects of the potential confounders mentioned above in five models (outlined in the  
220 Methods section). The analysis identified several bacterial species that showed significant associations  
221 with vigorous PA after adjusting for FDR at 0.05 and 0.1 (see FIGURE 2, TABLE S5, FIGURE S1).  
222 In FIGURE S1, we present six sequential models adjusting for age, sex, BMI, Bristol stool consistency,  
223 Lifelines Diet Score and caloric intake, and alcohol intake. We present the most interesting transitions  
224 in FIGURE 2 of these six models, specifically Models 1, 2, and 5. This stepwise approach reveals how  
225 each factor influences the relationship, providing a more nuanced and robust analysis than a single plot  
226 or analysis could offer.

227

228 In the unadjusted model (Model 0), vigorous PA was significantly associated with relative abundances  
229 of several bacterial species (TABLE S5, FIGURE S1). *Lawsonibacter asaccharolyticus* and  
230 *Flavonifractor plautii* exhibited a significantly reduced relative abundance ( $\beta = -4.33 \times 10^{-3}$ ,  $p = 4.29 \times 10^{-3}$ ;  
231  $\beta = -7.78 \times 10^{-3}$ ,  $p = 0.014$ , respectively). *Faecalibacterium prausnitzii*, *Oscillibacter sp. 57\_20*, and  
232 *Bacteroides vulgatus* also showed significantly lower relative abundance with vigorous PA ( $\beta = 0.02$ ,  
233  $p = 0.028$ ;  $\beta = 0.024$ ,  $p = 0.032$ ;  $\beta = -0.037$ ,  $p = 0.045$ , respectively). In contrast, *Firmicutes bacterium*  
234 *CAG 238* and *Victivallis vadensis* displayed a higher relative abundance with vigorous PA ( $\beta = 2.69 \times 10^{-3}$ ,  
235  $p = 0.017$ ;  $\beta = 9.23 \times 10^{-3}$ ,  $p = 0.034$ , respectively).

236

237 After adjusting for age and sex (Model 1), the associations between vigorous PA and the gut  
238 microbiome remained largely unchanged, with *Roseburia hominis* and *Butyrivibrio crossotus* showing  
239 higher relative abundances ( $\beta = 7.67 \times 10^{-3}$ ,  $p = 0.034$ ;  $\beta = 0.017$ ,  $p = 0.041$ , respectively). Further  
240 adjustments for BMI (Model 2) reduced the number of significant associations, with only  
241 *Lawsonibacter asaccharolyticus*, *Flavonifractor plautii*, and *Firmicutes bacterium CAG 238*  
242 maintaining their associations. Adjusting for stool consistency (Model 3) narrowed these down further,  
243 leaving only *Firmicutes bacterium CAG 238* with a higher abundance and *Lawsonibacter*  
244 *asaccharolyticus* and *Flavonifractor plautii* with lower abundances. Finally, in Models 4 and 5, which  
245 adjusted for diet quality and alcohol intake, only *Lawsonibacter asaccharolyticus* remained significantly  
246 associated with vigorous PA. Replicating the analysis for moderate PA revealed no significant  
247 associations (TABLE S7).

248

249 VIGOROUS PA IS ASSOCIATED WITH REDUCTION AND ENRICHMENT OF MICROBIAL  
250 FUNCTIONALITY

251

252 Beyond relative abundance of bacterial species, it is important to understand the functional pathways  
253 that may further elucidate the metabolic profiles of individuals in the vigorous PA group compared to  
254 the sedentary group. Therefore, we further tested for associations between gut microbial functional  
255 pathways quantified from shotgun metagenomes and levels of vigorous PA using various regression  
256 models (Models 0-5, as detailed in the Methods section). The analysis uncovered functional pathway  
257 abundances significantly linked to vigorous PA following adjustment for FDR at 0.05 and 0.1 (see  
258 FIGURE 3, TABLE S6, FIGURE S2).

259

260 In the unadjusted Model 0, vigorous PA was significantly associated with a range of functional  
261 pathways compared to sedentary PA (TABLE S6, FIGURE S2). *Pyruvate fermentation to acetate and*  
262 *lactate II* (hereafter referred to as *pyruvate fermentation*), *purine ribonucleosides degradation*, and  
263 *starch degradation V* showed an enriched microbial functionality ( $\beta = 1.06 \times 10^{-4}$ ,  $p = 4.13 \times 10^{-4}$ ;  $\beta =$   
264  $4.25 \times 10^{-4}$ ,  $p = 4.13 \times 10^{-4}$ ;  $\beta = 3.38 \times 10^{-4}$ ,  $p = 5.40 \times 10^{-3}$ , respectively). In contrast, *N10-formyl*  
265 *tetrahydrofolate biosynthesis* and *phosphopantothenate biosynthesis I* exhibited a reduced microbial  
266 functionality with vigorous PA ( $\beta = 1.22 \times 10^{-4}$ ,  $p = 7.97 \times 10^{-6}$ ;  $\beta = -1.83 \times 10^{-4}$ ,  $p = 0.026$ , respectively).

267

268 After adjusting for age and sex (Model 1), vigorous physical activity remained consistently associated  
269 with pathways related to *pyruvate fermentation*, *purine ribonucleosides degradation*, and *starch*  
270 *degradation V*, while *N10-formyl tetrahydrofolate biosynthesis* and *phosphopantothenate biosynthesis*  
271 *I* showed reduced abundances (FIGURE 3, TABLE S6, FIGURE S2). Adjusting for BMI (Model 2)  
272 maintained most associations, though the link with *N10-formyl tetrahydrofolate biosynthesis* and  
273 *phosphopantothenate biosynthesis I* weakened. Further adjustments for stool consistency (Model 3)  
274 narrowed the associations, with only *pyruvate fermentation* and *purine ribonucleosides degradation*  
275 pathways remaining enriched. In the final models accounting for diet quality and alcohol intake (Models  
276 4 and 5), only these two pathways persisted. Replicating the analysis for moderate PA revealed no  
277 significant associations (TABLE S8).

278 **DISCUSSION**

279

280 This study explored the associations of PA on gut microbial diversity, focusing on the relation of  
281 vigorous PA and relative species abundance, and function, addressing a key gap in understanding how  
282 PA influences gut microbiome characteristics independently from other lifestyle factors in the Lifelines  
283 DMP cohort aged 40-60 years. For each of these outcomes we employed multiple regression models by  
284 sequentially adding covariates including age and sex, BMI, stool consistence, and diet quality (Models  
285 0 to 5). Only vigorous PA, and not moderate PA, associated with the outcomes. The fully adjusted  
286 models revealed that vigorous PA is associated with moderately increase species richness, Shannon  
287 diversity, and Simpson diversity indices compared to sedentary PA, independent of all tested covariates.  
288 Additionally, *Lawsonibacter asaccharolyticus* was found to have lower relative abundance in those  
289 engaging in vigorous PA. Two functional pathways—*Pyruvate fermentation to acetate and lactate II*,  
290 and *purine ribonucleosides degradation*—were enriched in the vigorous PA group, even after  
291 accounting for confounders. These findings highlight the unique role of vigorous PA in enhancing gut  
292 microbial diversity and specific functional pathways, offering new insights into the benefits of PA on  
293 gut characteristics.

294

295 The stratification based on PA intensity levels is essential to this study. As expected, the vigorous PA  
296 group was generally younger, more male-dominated, and had lower BMIs compared to those with  
297 moderate or sedentary activity levels, indicating that age and body composition may influence one's  
298 capacity or inclination for intense physical activities. Social, cultural, or physiological factors may  
299 influence potential gender differences in activity preferences (30–32). The research also revealed a  
300 slight difference in stool consistency with higher PA intensity, indicating a potential physiological effect  
301 of PA on gut function (33). Our analyses revealed that vigorous, but not moderate PA, was associated  
302 with a higher gut microbial species richness, Shannon diversity, and Simpson diversity. These results  
303 indicate that vigorous activity may be associated with the gut microbiome in terms of gut motility,  
304 oxygen levels, and metabolic processes (34–37). Additionally, the study observed variations in dietary  
305 patterns, with more active individuals consuming slightly more calories and having higher diet quality  
306 scores, implying that they may be more health-conscious or have greater nutritional needs (38,39). The  
307 study also found that alcohol intake was similar and low across all activity levels.

308

309 Our results also potentially suggest that engaging in moderate PA, defined as at least 150 minutes per  
310 week of moderate PA, does not exert the same influence on microbial diversity as vigorous PA. This  
311 underscores the importance of considering activity intensity levels when studying their effects on the  
312 gut microbiome. Longitudinal studies are required to determine whether vigorous PA would indeed be  
313 the only class of PA that beneficially affects gut microbial characteristics. This may especially be

314 relevant in recommendations to older populations pressing the relevance of resistance training also for  
315 sustaining muscle health.

316

317 Our exploration into gut microbial species and functional pathways revealed how vigorous PA,  
318 independent from the range of covariates is associated to relative abundance of one bacterial species  
319 (*Lawsonibacter asaccharolyticus*) and with higher relative abundance of two functional pathways.  
320 *Lasaccharolyticus* was only recently described and, while largely presumed to be a butyrate producer,  
321 it essentially remains functionally uncharacterized (40). A reduced abundance of this species has been  
322 recently associated with increased gut permeability in stroke patients, which may be associated with  
323 detrimental systemic inflammation (41). This may be conceivable given that PA may temporarily  
324 induce an inflammatory response following a bout of exercise due to physical stress (37). Furthermore,  
325 we found that vigorous PA is associated with higher metagenomic levels of the *Pyruvate fermentation*  
326 *to acetate and lactate II* pathway after extensive covariate adjustments. Acetate and lactate play a  
327 crucial role in healthy gut homeostasis; acetate supports intestinal epithelial integrity and serves as an  
328 energy source, while lactate plays a role in gluconeogenesis, aiding metabolic balance (42). Similarly,  
329 the pathway *Purine ribonucleosides degradation* also displayed higher metagenomic levels in the  
330 vigorous PA group after covariate adjustment. This pathway involves the degradation of purine  
331 ribonucleosides, crucial for nucleotide recycling and energy metabolism essential for cellular repair and  
332 function (43). Enhanced breakdown of purine ribonucleosides may potentially suggest an association  
333 with energy requirements, cellular resilience, and metabolic efficiency (44)

334

335 Diet quality, as embodied by the Lifelines Diet Score, emerged as a crucial covariate that may be more  
336 directly associated with *Flavonifactor plautii* and *N10-formyl tetrahydrofolate biosynthesis* than to  
337 vigorous PA. *F. plautii* initially displayed a lower relative abundance with vigorous PA, but this effect  
338 diminished once dietary adjustments were applied. This may suggest that this species, which degrades  
339 flavonoids may have a stronger connection to dietary factors, particularly fiber and flavonoid intake  
340 rather than vigorous PA itself (45). Thus, while vigorous PA might contribute to a healthier gut  
341 environment, dietary factors, including fiber and flavonoids, appear to have a more pronounced impact  
342 on the abundance of *F. plautii*. Similarly, the adjustment for diet eliminated the association of vigorous  
343 PA with the metagenomic levels with *N10-formyl tetrahydrofolate biosynthesis* is involved in the  
344 synthesis of N10-formyl tetrahydrofolate, a key compound in one-carbon metabolism and nucleotide  
345 synthesis, essential for cell growth and overall metabolism (46). Previous research suggests that the  
346 *N10-formyl tetrahydrofolate biosynthesis* has probiotic properties that are associated with the  
347 abundance of commensal bacterial species that have beneficial effects on obesity and diabetes (47).  
348 Given that folate, the original substrate of the upstream reaction in this metabolic pathway may only be  
349 obtained through diet, it is plausible to infer that this covariate is more influential than PA itself.

350

351 This study has notable strengths, including the use of a large cohort with metagenomic profiling, which  
352 provides high resolution and statistical power for examining the relationship between vigorous physical  
353 activity and gut microbiome diversity. The sequential adjustment for covariates such as age, sex, BMI,  
354 stool consistency (measured using the 7-day average Bristol Stool Chart), diet quality, and alcohol  
355 intake helps clarify whether PA is independently associated with gut microbial species and pathways.  
356 Initially, vigorous PA appeared to be associated with certain bacterial species, but these associations  
357 often diminished after adjusting for these covariates. This suggests that microbiome changes may not  
358 be directly driven by PA itself, but rather influenced by other factors, such as diet, which was assessed  
359 using the Lifelines Diet Score. Diet, known for its significant impact on microbial composition, often  
360 eclipses the effects of PA as evidenced in this study, while BMI and stool consistency further modulate  
361 gut microbial populations by affecting metabolic health and gut transit time, respectively (48–50).

362  
363 However, several limitations must be acknowledged. The cross-sectional design limits our ability to  
364 establish causal relationships between PA and gut microbiome diversity, allowing us only to observe  
365 associations. The present study is only based on one study cohort without replication, therefore limiting  
366 its generalizability. Additionally, self-reported data on PA and alcohol intake may be susceptible to  
367 biases, such as social desirability and recall inaccuracies. Using objective measurements, like  
368 accelerometers, could improve the precision of PA data and their associations with bacterial relative  
369 abundances and metagenomic pathway levels. Furthermore, many bacterial species within the gut  
370 microbiome remain poorly understood in terms of their specific functions, adding complexity to  
371 interpreting their roles concerning PA. These factors highlight the need for caution in concluding the  
372 direct effects of PA on the gut microbiome.

373  
374 In conclusion, this study elucidates significant associations between vigorous PA and the abundance of  
375 specific gut bacterial species and functional pathways independent of diet and body composition. While  
376 moderate PA was not linked to gut microbiome outcomes, vigorous PA showed associations with the  
377 abundance of one bacterial species and two metagenomic pathways. These findings suggest that PA  
378 alone, even at higher intensities, may not be as effective as diet to modulate the gut microbiome for  
379 health benefits. These insights provide an incentive for future research to extensively account for  
380 covariates to longitudinally explore whether and how vigorous or in combination with moderate PA  
381 may directly or indirectly modulate the gut microbiome. The observed associations underscore the  
382 importance of considering PA and covariates in the broader context of gut health and overall well-being.



383 **ACKNOWLEDGMENTS**

384

385 The authors wish to acknowledge the services of the Lifelines Cohort Study, the contributing research  
386 centres delivering data to Lifelines, and all the study participants. The Lifelines initiative has been made  
387 possible by subsidy from the Dutch Ministry of Health, Welfare and Sport, the Dutch Ministry of  
388 Economic Affairs, the University Medical Center Groningen (UMCG), Groningen University and the  
389 Provinces in the North of the Netherlands (Drenthe, Friesland, Groningen).

390

391 This work is funded by the VOILA Consortium (ZonMw 457001001), which had no role in the design  
392 and conduct of the study; collection, management, analysis, and interpretation of the data; and  
393 preparation, review, or approval of the manuscript.

394

## 395 REFERENCES

- 396 1. Franklin BA, Wedig IJ, Sallis RE, Lavie CJ, Elmer SJ. Physical Activity and Cardiorespiratory  
397 Fitness as Modulators of Health Outcomes: A Compelling Research-Based Case Presented to  
398 the Medical Community. *Mayo Clin Proc.* 2023 Feb 1;98(2):316–31.
- 399 2. Kelly RS, Kelly MP, Kelly P. Metabolomics, physical activity, exercise and health: A review  
400 of the current evidence. *Biochim Biophys Acta Mol Basis Dis* [Internet]. 2020 Dec 1 [cited  
401 2024 Jul 6];1866(12). Available from: <https://pubmed.ncbi.nlm.nih.gov/32827647/>
- 402 3. Belanger MJ, Rao P, Robbins JM. Exercise, Physical Activity, and Cardiometabolic Health:  
403 Pathophysiologic Insights. *Cardiol Rev* [Internet]. 2022 May 1 [cited 2024 Jul 6];30(3):134–  
404 44. Available from: <https://pubmed.ncbi.nlm.nih.gov/34560713/>
- 405 4. An HY, Chen W, Wang CW, Yang HF, Huang WT, Fan SY. The Relationships between  
406 Physical Activity and Life Satisfaction and Happiness among Young, Middle-Aged, and Older  
407 Adults. *Int J Environ Res Public Health* [Internet]. 2020 Jul 1 [cited 2024 Jul 6];17(13):1–10.  
408 Available from: <https://pubmed.ncbi.nlm.nih.gov/32635457/>
- 409 5. Wassenaar TM, Wheatley CM, Beale N, Nichols T, Salvan P, Meaney A, et al. The effect of a  
410 one-year vigorous physical activity intervention on fitness, cognitive performance and mental  
411 health in young adolescents: the Fit to Study cluster randomised controlled trial. *Int J Behav*  
412 *Nutr Phys Act* [Internet]. 2021 Dec 1 [cited 2024 Jul 6];18(1). Available from:  
413 <https://pubmed.ncbi.nlm.nih.gov/33789683/>
- 414 6. Wegierska AE, Charitos IA, Topi S, Potenza MA, Montagnani M, Santacroce L. The  
415 Connection Between Physical Exercise and Gut Microbiota: Implications for Competitive  
416 Sports Athletes. *Sports Med* [Internet]. 2022 Oct 1 [cited 2024 Jul 6];52(10):2355–69.  
417 Available from: <https://pubmed.ncbi.nlm.nih.gov/35596883/>
- 418 7. Morwani-Mangnani J, Rodriguez-Gironde M, Singh-Povel C, Verlaan S, Beekman M,  
419 Slagboom PE. Physical activity and fiber intake beneficial for muscle mass and strength  
420 preservation during aging: A comprehensive cross-sectional study in the UK biobank cohort.  
421 *Exp Gerontol.* 2024 Aug 1;193:112474.
- 422 8. Campaniello D, Corbo MR, Sinigaglia M, Speranza B, Racioppo A, Altieri C, et al. How Diet  
423 and Physical Activity Modulate Gut Microbiota: Evidence, and Perspectives. *Nutrients*  
424 [Internet]. 2022 Jun 1 [cited 2024 Jul 6];14(12). Available from:  
425 <https://pubmed.ncbi.nlm.nih.gov/35745186/>
- 426 9. Marttinen M, Ala-Jaakkola R, Laitila A, Lehtinen MJ. Gut Microbiota, Probiotics and Physical  
427 Performance in Athletes and Physically Active Individuals. *Nutrients* [Internet]. 2020 Oct 1  
428 [cited 2024 Jul 6];12(10):1–39. Available from: <https://pubmed.ncbi.nlm.nih.gov/32992765/>
- 429 10. Álvarez-Herms J, Odriozola A. Microbiome and physical activity. *Adv Genet* [Internet]. 2024  
430 Jan 1 [cited 2024 Jul 6];111:409–50. Available from:  
431 <https://pubmed.ncbi.nlm.nih.gov/38908903/>
- 432 11. Wang K, Mehta RS, Ma W, Nguyen LH, Wang DD, Ghazi AR, et al. The gut microbiome  
433 modifies the associations of short- and long-term physical activity with body weight changes.  
434 *Microbiome* [Internet]. 2023 Dec 1 [cited 2024 Jul 6];11(1):1–17. Available from:  
435 <https://link.springer.com/articles/10.1186/s40168-023-01542-w>
- 436 12. Pérez-Prieto I, Migueles JH, Molina NM, Sola-Leyva A, Salas-Espejo E, Arffman RK, et al.  
437 Association of Accelerometer-Determined Physical Activity and Sedentary Behavior With the  
438 Gut Microbiome in Middle-Aged Women: A Compositional Data Approach. *Scand J Med Sci*



- 439 Sports [Internet]. 2024 Jul 1 [cited 2024 Jul 6];34(7):e14689. Available from:  
440 <https://onlinelibrary.wiley.com/doi/full/10.1111/sms.14689>
- 441 13. Baldanzi G, Sayols-Baixeras S, Ekblom-Bak E, Ekblom Ö, Dekkers KF, Hammar U, et al.  
442 Accelerometer-based physical activity is associated with the gut microbiota in 8416  
443 individuals in SCAPIS. *EBioMedicine* [Internet]. 2024 Feb 1 [cited 2024 Jul 6];100. Available  
444 from: <http://www.thelancet.com/article/S2352396424000240/fulltext>
- 445 14. Bull FC, Al-Ansari SS, Biddle S, Borodulin K, Buman MP, Cardon G, et al. World Health  
446 Organization 2020 guidelines on physical activity and sedentary behaviour. *Br J Sports Med*  
447 [Internet]. 2020 Dec 1 [cited 2024 Jul 6];54(24):1451–62. Available from:  
448 <https://pubmed.ncbi.nlm.nih.gov/33239350/>
- 449 15. Miao Z, Du W, Xiao C, Su C, Gou W, Shen L, et al. Gut microbiota signatures of long-term  
450 and short-term plant-based dietary pattern and cardiometabolic health: a prospective cohort  
451 study. *BMC Med* [Internet]. 2022 Dec 1 [cited 2024 Jul 6];20(1):1–15. Available from:  
452 <https://link.springer.com/articles/10.1186/s12916-022-02402-4>
- 453 16. Liu G, Li J, Li Y, Hu Y, Franke AA, Liang L, et al. Gut microbiota–derived metabolites and  
454 risk of coronary artery disease: a prospective study among US men and women. *Am J Clin*  
455 *Nutr*. 2021 Jul 1;114(1):238–47.
- 456 17. Schorr KA, Agayn V, de Groot LCPGM, Slagboom PE, Beekman M. A plant-based diet index  
457 to study the relation between diet and disease risk among adults: a narrative review. *J Nutr*  
458 *Health Aging* [Internet]. 2024 Jun 1 [cited 2024 Jul 6];28(6). Available from:  
459 <https://pubmed.ncbi.nlm.nih.gov/38815475/>
- 460 18. Vandeputte D, Falony G, Vieira-Silva S, Tito RY, Joossens M, Raes J. Stool consistency is  
461 strongly associated with gut microbiota richness and composition, enterotypes and bacterial  
462 growth rates. *Gut* [Internet]. 2016 Jan 1 [cited 2024 Jul 6];65(1):57–62. Available from:  
463 <https://pubmed.ncbi.nlm.nih.gov/26069274/>
- 464 19. Ling Z, Liu X, Cheng Y, Yan X, Wu S. Gut microbiota and aging. *Crit Rev Food Sci Nutr*  
465 [Internet]. 2022 [cited 2024 Jul 6];62(13):3509–34. Available from:  
466 <https://pubmed.ncbi.nlm.nih.gov/33377391/>
- 467 20. Dominianni C, Sinha R, Goedert JJ, Pei Z, Yang L, Hayes RB, et al. Sex, body mass index,  
468 and dietary fiber intake influence the human gut microbiome. *PLoS One* [Internet]. 2015 Apr  
469 15 [cited 2024 Jul 6];10(4). Available from: <https://pubmed.ncbi.nlm.nih.gov/25874569/>
- 470 21. Segovia-Rodríguez L, Echeverry-Alzate V, Rincón-Pérez I, Calleja-Conde J, Bühler KM, Giné  
471 E, et al. Gut microbiota and voluntary alcohol consumption. *Transl Psychiatry* [Internet]. 2022  
472 Dec 1 [cited 2024 Jul 6];12(1). Available from: <https://pubmed.ncbi.nlm.nih.gov/35393390/>
- 473 22. Badal VD, Vaccariello ED, Murray ER, Yu KE, Knight R, Jeste D V., et al. The Gut  
474 Microbiome, Aging, and Longevity: A Systematic Review. *Nutrients* [Internet]. 2020 Dec 1  
475 [cited 2024 Jul 6];12(12):1–25. Available from: <https://pubmed.ncbi.nlm.nih.gov/33297486/>
- 476 23. Pinart M, Dötsch A, Schlicht K, Laudes M, Bouwman J, Forslund SK, et al. Gut Microbiome  
477 Composition in Obese and Non-Obese Persons: A Systematic Review and Meta-Analysis.  
478 *Nutrients* [Internet]. 2021 Jan 1 [cited 2024 Jul 6];14(1). Available from:  
479 <https://pubmed.ncbi.nlm.nih.gov/35010887/>
- 480 24. Bridgewater LC, Zhang C, Wu Y, Hu W, Zhang Q, Wang J, et al. Gender-based differences in  
481 host behavior and gut microbiota composition in response to high fat diet and stress in a mouse

- 482 model. *Scientific Reports* 2017 7:1 [Internet]. 2017 Sep 7 [cited 2024 Aug 7];7(1):1–12.  
483 Available from: <https://www.nature.com/articles/s41598-017-11069-4>
- 484 25. Scholtens S, Smidt N, Swertz MA, Bakker SJL, Dotinga A, Vonk JM, et al. Cohort Profile:  
485 LifeLines, a three-generation cohort study and biobank. *Int J Epidemiol* [Internet]. 2015 Aug 1  
486 [cited 2024 Jul 8];44(4):1172–80. Available from: <https://pubmed.ncbi.nlm.nih.gov/25502107/>
- 487 26. Tigchelaar EF, Zhernakova A, Dekens JAM, Hermes G, Baranska A, Mujagic Z, et al. Cohort  
488 profile: LifeLines DEEP, a prospective, general population cohort study in the northern  
489 Netherlands: study design and baseline characteristics. *BMJ Open* [Internet]. 2015 [cited 2024  
490 Jul 8];5(8). Available from: <https://pubmed.ncbi.nlm.nih.gov/26319774/>
- 491 27. Lifelines catalog [Internet]. [cited 2024 Aug 7]. Available from: <https://data-catalogue.lifelines.nl/@molgenis-experimental/molgenis-app-lifelines-webshop/dist/index.html#/shop/>
- 494 28. Gacesa R, Kurilshikov A, Vich Vila A, Sinha T, Klaassen MAY, Bolte LA, et al.  
495 Environmental factors shaping the gut microbiome in a Dutch population. *Nature* 2022  
496 604:7907 [Internet]. 2022 Apr 13 [cited 2024 Jul 9];604(7907):732–9. Available from:  
497 <https://www.nature.com/articles/s41586-022-04567-7>
- 498 29. Caspi R, Billington R, Keseler IM, Kothari A, Krummenacker M, Midford PE, et al. The  
499 MetaCyc database of metabolic pathways and enzymes - a 2019 update. *Nucleic Acids Res*  
500 [Internet]. 2020 Jan 1 [cited 2024 Oct 3];48(D1):D445. Available from:  
501 <https://pubmed.ncbi.nlm.nih.gov/33121230/>
- 502 30. Nuzzo JL. Narrative Review of Sex Differences in Muscle Strength, Endurance, Activation,  
503 Size, Fiber Type, and Strength Training Participation Rates, Preferences, Motivations, Injuries,  
504 and Neuromuscular Adaptations. *J Strength Cond Res* [Internet]. 2023 Feb 1 [cited 2024 Jul  
505 9];37(2):494–536. Available from: [https://journals.lww.com/nsca-jscr/fulltext/2023/02000/narrative\\_review\\_of\\_sex\\_differences\\_in\\_muscle.28.aspx](https://journals.lww.com/nsca-jscr/fulltext/2023/02000/narrative_review_of_sex_differences_in_muscle.28.aspx)
- 507 31. Azevedo MR, Araújo CLP, Reichert FF, Siqueira FV, da Silva MC, Hallal PC. Gender  
508 differences in leisure-time physical activity. *Int J Public Health* [Internet]. 2007 [cited 2024 Jul  
509 9];52(1):8–15. Available from: <https://pubmed.ncbi.nlm.nih.gov/17966815/>
- 510 32. Morwani-Mangnani J, Giannos P, Belzer C, Beekman M, Eline Slagboom P, Prokopidis K.  
511 Gut microbiome changes due to sleep disruption in older and younger individuals: a case for  
512 sarcopenia? *Sleep* [Internet]. 2022 Dec 12 [cited 2023 Aug 25];45(12). Available from:  
513 <https://dx.doi.org/10.1093/sleep/zsac239>
- 514 33. Strid H, Simréén M, Störsrud S, Stotzer PO, Sadik R. Effect of heavy exercise on  
515 gastrointestinal transit in endurance athletes. *Scand J Gastroenterol* [Internet]. 2011 Jun [cited  
516 2024 Jul 9];46(6):673–7. Available from: <https://pubmed.ncbi.nlm.nih.gov/21366388/>
- 517 34. Clauss M, Gérard P, Mosca A, Leclerc M. Interplay Between Exercise and Gut Microbiome in  
518 the Context of Human Health and Performance. *Front Nutr* [Internet]. 2021 Jun 10 [cited 2024  
519 Jul 9];8. Available from: <https://pubmed.ncbi.nlm.nih.gov/34179053/>
- 520 35. Allen JM, Mailing LJ, Niemi GM, Moore R, Cook MD, White BA, et al. Exercise Alters  
521 Gut Microbiota Composition and Function in Lean and Obese Humans. *Med Sci Sports Exerc*  
522 [Internet]. 2018 Apr 1 [cited 2024 Jul 9];50(4):747–57. Available from:  
523 <https://pubmed.ncbi.nlm.nih.gov/29166320/>
- 524 36. Hintikka JE, Ahtiainen JP, Permi P, Jalkanen S, Lehtonen M, Pekkala S. Aerobic exercise  
525 training and gut microbiome-associated metabolic shifts in women with overweight: a multi-

- 526 omic study. *Scientific Reports* 2023 13:1 [Internet]. 2023 Jul 11 [cited 2024 Jul 9];13(1):1–12.  
527 Available from: <https://www.nature.com/articles/s41598-023-38357-6>
- 528 37. Boytar AN, Skinner TL, Wallen RE, Jenkins DG, Dekker Nitert M. The Effect of Exercise  
529 Prescription on the Human Gut Microbiota and Comparison between Clinical and Apparently  
530 Healthy Populations: A Systematic Review. *Nutrients* [Internet]. 2023 Mar 1 [cited 2024 Jul  
531 9];15(6). Available from: <https://pubmed.ncbi.nlm.nih.gov/36986264/>
- 532 38. Joo J, Williamson SA, Vazquez AI, Fernandez JR, Bray MS. The Influence of 15-week  
533 Exercise Training on Dietary Patterns among Young Adults. *Int J Obes (Lond)* [Internet]. 2019  
534 Sep 1 [cited 2024 Jul 9];43(9):1681. Available from: [/pmc/articles/PMC6639161/](https://pubmed.ncbi.nlm.nih.gov/36639161/)
- 535 39. Zeppa SD, Sisti D, Amatori S, Gervasi M, Agostini D, Piccoli G, et al. High-intensity Interval  
536 Training Promotes the Shift to a Health-Supporting Dietary Pattern in Young Adults. *Nutrients*  
537 [Internet]. 2020 Mar 1 [cited 2024 Jul 9];12(3). Available from:  
538 <https://pubmed.ncbi.nlm.nih.gov/32245173/>
- 539 40. Sakamoto M, Iino T, Yuki M, Ohkuma M. *Lawsonibacter asaccharolyticus* gen. nov., sp. nov.,  
540 a butyrate-producing bacterium isolated from human faeces. *Int J Syst Evol Microbiol*  
541 [Internet]. 2018 Jun 1 [cited 2024 Jul 9];68(6):2074–81. Available from:  
542 <https://pubmed.ncbi.nlm.nih.gov/29745868/>
- 543 41. Hammond TC, Powell E, Green SJ, Chlipala G, Frank J, Yackzan AT, et al. Functional  
544 recovery outcomes following acute stroke is associated with abundance of gut microbiota  
545 related to inflammation, butyrate and secondary bile acid. *Frontiers in Rehabilitation Sciences*  
546 [Internet]. 2022 [cited 2024 Jul 9];3. Available from: [/pmc/articles/PMC9644110/](https://pubmed.ncbi.nlm.nih.gov/36644110/)
- 547 42. Louis P, Duncan SH, Sheridan PO, Walker AW, Flint HJ. Microbial lactate utilisation and the  
548 stability of the gut microbiome. *Gut Microbiome* [Internet]. 2022 [cited 2024 Jul 9];3:e3.  
549 Available from: [https://www.cambridge.org/core/journals/gut-microbiome/article/microbial-  
550 lactate-utilisation-and-the-stability-of-the-gut-  
551 microbiome/70FFDA0D826775206007393EB4E21FE2](https://www.cambridge.org/core/journals/gut-microbiome/article/microbial-lactate-utilisation-and-the-stability-of-the-gut-microbiome/70FFDA0D826775206007393EB4E21FE2)
- 552 43. Bennett EM, Li C, Allan PW, Parker WB, Ealick SE. Structural basis for substrate specificity  
553 of *Escherichia coli* purine nucleoside phosphorylase. *J Biol Chem* [Internet]. 2003 Nov 21  
554 [cited 2024 Jul 9];278(47):47110–8. Available from:  
555 <https://pubmed.ncbi.nlm.nih.gov/12937174/>
- 556 44. Zieliński J, Slominska EM, Król-Zielińska M, Krasieński Z, Kusy K. Purine metabolism in  
557 sprint- vs endurance-trained athletes aged 20–90 years. *Scientific Reports* 2019 9:1 [Internet].  
558 2019 Aug 19 [cited 2024 Jul 9];9(1):1–10. Available from:  
559 <https://www.nature.com/articles/s41598-019-48633-z>
- 560 45. Latorre-Pérez A, Hernández M, Iglesias JR, Morán J, Pascual J, Porcar M, et al. The Spanish  
561 gut microbiome reveals links between microorganisms and Mediterranean diet. *Scientific*  
562 *Reports* 2021 11:1 [Internet]. 2021 Nov 10 [cited 2024 Oct 10];11(1):1–12. Available from:  
563 <https://www.nature.com/articles/s41598-021-01002-1>
- 564 46. Celeste LR, Chai G, Bielak M, Minor W, Lovelace LL, Lebioda L. Mechanism of N10-  
565 formyltetrahydrofolate synthetase derived from complexes with intermediates and inhibitors.  
566 *Protein Sci* [Internet]. 2012 Feb [cited 2024 Jul 9];21(2):219. Available from:  
567 [/pmc/articles/PMC3324766/](https://pubmed.ncbi.nlm.nih.gov/2194766/)
- 568 47. Zhang F, Zuo T, Wan Y, Xu Z, Cheung C, Li AY, et al. Multi-omic analyses identify mucosa  
569 bacteria and fecal metabolites associated with weight loss after fecal microbiota

- 570 transplantation. The Innovation [Internet]. 2022 Sep 9 [cited 2024 Oct 10];3(5). Available  
571 from: [/pmc/articles/PMC9460156/](#)
- 572 48. Vinke PC, Corpeleijn E, Dekker LH, Jacobs DR, Navis G, Kromhout D. Development of the  
573 food-based Lifelines Diet Score (LLDS) and its application in 129,369 Lifelines participants.  
574 European Journal of Clinical Nutrition 2018 72:8 [Internet]. 2018 Jun 12 [cited 2024 Oct  
575 10];72(8):1111–9. Available from: <https://www.nature.com/articles/s41430-018-0205-z>
- 576 49. Liu S, Zhao W, Liu X, Cheng L. Metagenomic analysis of the gut microbiome in  
577 atherosclerosis patients identify cross-cohort microbial signatures and potential therapeutic  
578 target. The FASEB Journal [Internet]. 2020 Nov 1 [cited 2024 Oct 10];34(11):14166–81.  
579 Available from: <https://onlinelibrary.wiley.com/doi/full/10.1096/fj.202000622R>
- 580 50. Minnebo Y, Delbaere K, Goethals V, Raes J, Van de Wiele T, De Paepe K. Gut microbiota  
581 response to in vitro transit time variation is mediated by microbial growth rates, nutrient use  
582 efficiency and adaptation to in vivo transit time. Microbiome [Internet]. 2023 Dec 1 [cited  
583 2024 Oct 10];11(1):1–15. Available from:  
584 <https://microbiomejournal.biomedcentral.com/articles/10.1186/s40168-023-01691-y>
- 585
- 586

587  
588  
589  
590  
591  
592  
593  
594  
595  
596  
597  
598  
599  
600  
601  
602  
603  
604

**FIGURE 1.** Flow diagram of the final included participants from the original Lifelines DMP cohort.

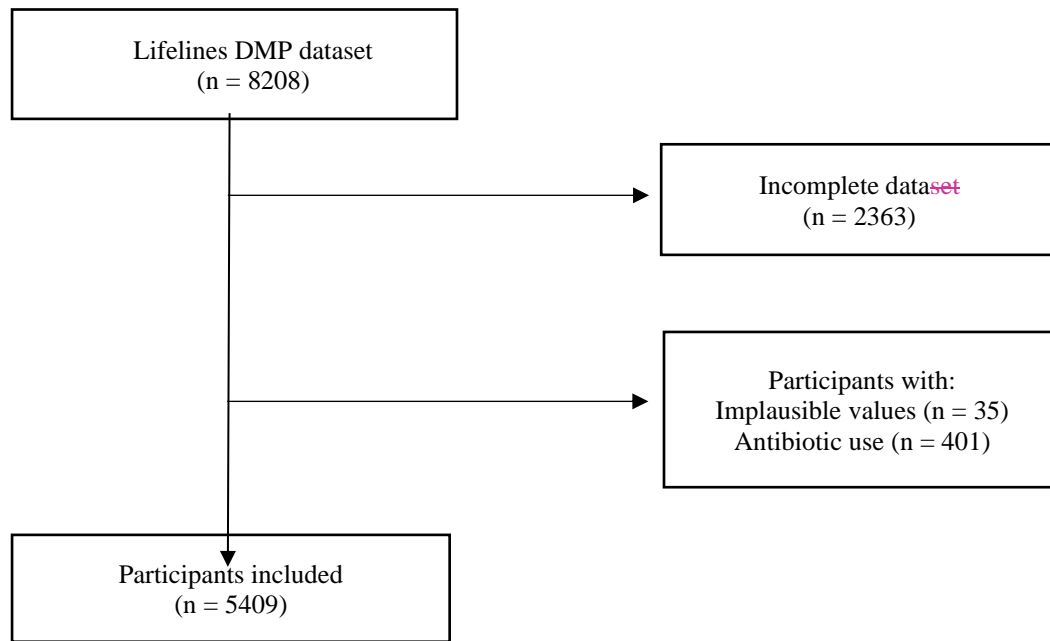

**TABLE 1.** Baseline characteristics of the selected Lifelines DMP cohort participants for analysis. One-way ANOVA tests were carried out to determine overall differences in means across three levels of PA.

|                                           | Physical Activity Level |                      |                     | Significance                       | All              |
|-------------------------------------------|-------------------------|----------------------|---------------------|------------------------------------|------------------|
|                                           | Sedentary<br>(N=2501)   | Moderate<br>(N=1915) | Vigorous<br>(N=993) | p-value                            | (N=5409)         |
| <b>Physical activity variables</b>        |                         |                      |                     |                                    |                  |
| Moderate activity (hours/week); mean (SD) | 0.92 (0.89)             | 11.61 (11.35)        | 1.25 (1.64)         | < <b>2.2x10<sup>-16</sup></b>      | 6.22 (9.58)      |
| Vigorous activity (hours/week); mean (SD) | 0.27 (0.66)             | 0.98 (1.92)          | 4.92 (3.31)         | < <b>2.2x10<sup>-16</sup></b>      | 1.52 (2.64)      |
| <b>Traditional covariates</b>             |                         |                      |                     |                                    |                  |
| Age (years); mean (SD)                    | 50.98 (11.10)           | 52.75 (11.25)        | 48.94 (11.46)       | <b>p &lt; 2.2x10<sup>-16</sup></b> | 51.42 (11.32)    |
| Sex (F); count (% total)                  | 1137 (59.4%)            | 1579 (63.1%)         | 470 (47.3%)         | -                                  | 3186 (58.9%)     |
| BMI; mean (SD)                            | 26.32 (4.20)            | 25.96 (3.93)         | 25.05 (3.60)        | <b>3.44x10<sup>-15</sup></b>       | 25.92 (3.99)     |
| <b>Gut-related covariates</b>             |                         |                      |                     |                                    |                  |
| Stool consistency (BSS); mean (SD)        | 46.8 (49.1)             | 46.1 (45.8)          | 42.8 (41.0)         | 0.052                              | 45.1 (44.1)      |
| <b>Dietary covariates</b>                 |                         |                      |                     |                                    |                  |
| Calorie intake (kCal/day); mean (SD)      | 2027.91 (592.25)        | 2053.95 (598.42)     | 2086.57 (579.89)    | <b>0.0319</b>                      | 2050.73 (593.10) |
| Lifelines Diet Score; mean (SD)           | 24.30 (5.73)            | 25.19 (5.86)         | 25.14 (6.01)        | <b>1.13x10<sup>-06</sup></b>       | 24.87 (5.85)     |
| Alcohol intake (g/day); mean (SD)         | 0.02 (0.03)             | 0.03 (0.03)          | 0.03 (0.03)         | 0.082                              | 0.03 (0.03)      |

**TABLE 2. Association of species richness, Shannon Diversity and Simpson Diversity with being moderately active and vigorously active (Model 5 adjusted for age, sex, BMI, Bristol Mean, calorie intake, Lifelines Diet Score, and alcohol intake). Species richness is additionally adjusted for sequencing depth. For results from all models, refer to TABLES S2-S4.**

|                          | Moderate activity      |         | Vigorous activity      |                              |
|--------------------------|------------------------|---------|------------------------|------------------------------|
|                          | Coefficient            | P-value | Coefficient            | P-value                      |
| <b>Species Richness</b>  | 0.061                  | 0.919   | 3.20                   | <b>7.80x10<sup>-05</sup></b> |
| <b>Shannon Diversity</b> | 6.38x10 <sup>-03</sup> | 0.531   | 0.031                  | <b>0.002</b>                 |
| <b>Simpson Diversity</b> | 3.8x10 <sup>-04</sup>  | 0.560   | 1.95x10 <sup>-03</sup> | <b>0.024</b>                 |

**FIGURE 2. Volcano plots depicting the association between vigorous physical activity levels and gut bacterial species.** Model 1 is adjusted for age and sex. Model 2 is additionally adjusted for BMI. Model 5 is additionally adjusted for Bristol Stool Mean, Lifelines Diet Score, and alcohol intake. Significant FDR adjusted p-values below 0.05 are marked in red. Below 0.10 are marked in blue. Higher mean abundances of the species are depicted by larger circumference of the data points.

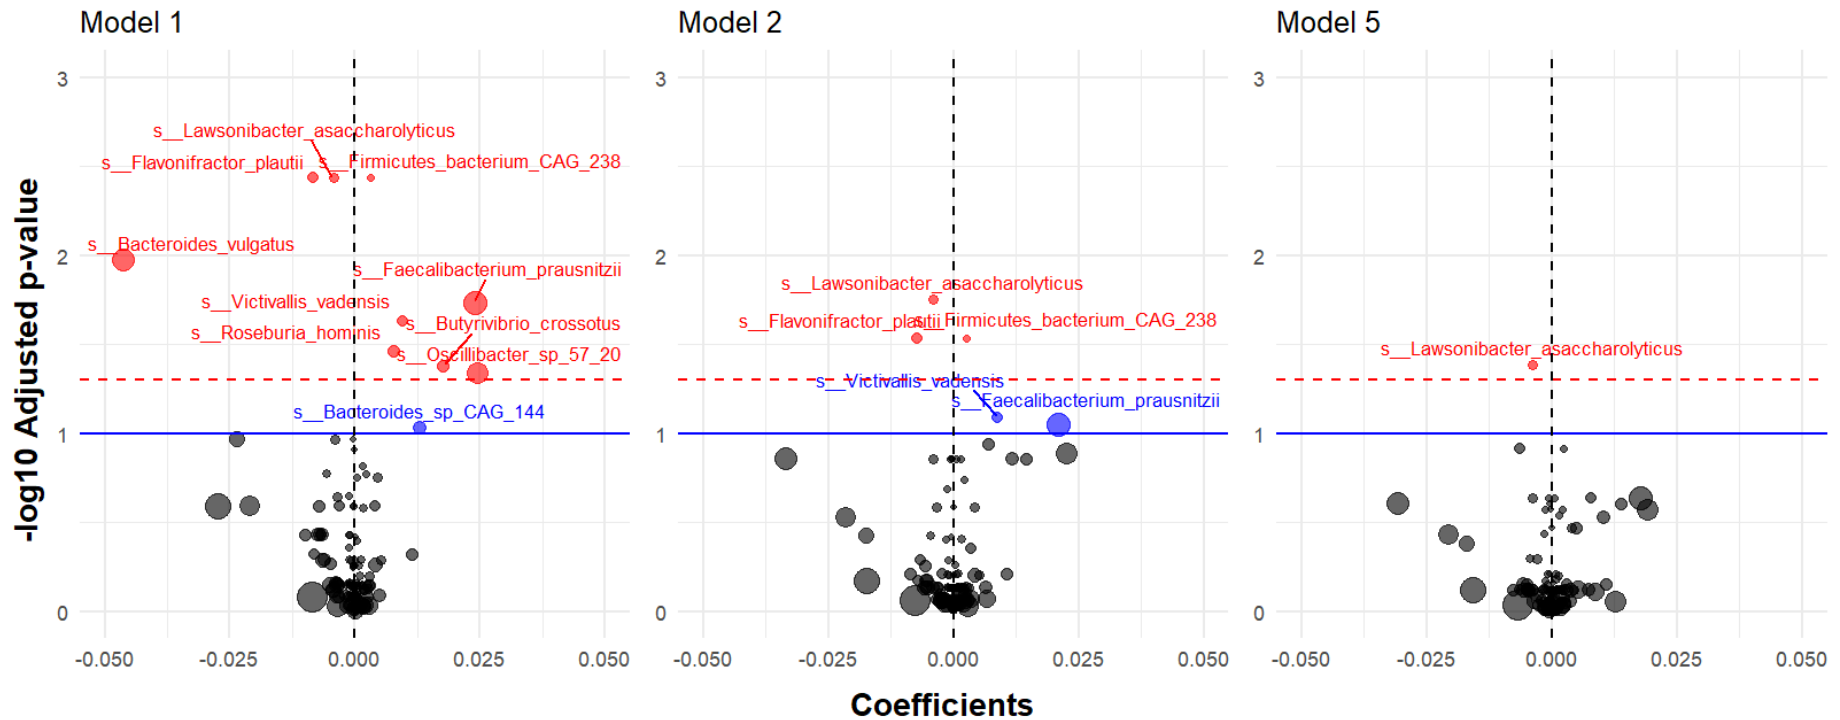



**FIGURE 3. Volcano plots of the multiple linear regression association between vigorous physical activity levels versus sedentary and gut bacterial functional pathways.** All 6 Models displayed in FIGURE S5. Model 1 is adjusted for age and sex. Model 2 is additionally adjusted for BMI. Model 5 is additionally adjusted for alcohol intake. Significant FDR adjusted p-values below 0.05 are marked in red, below 0.10 are marked in blue. Legend for coded pathway numbers displayed in table below.

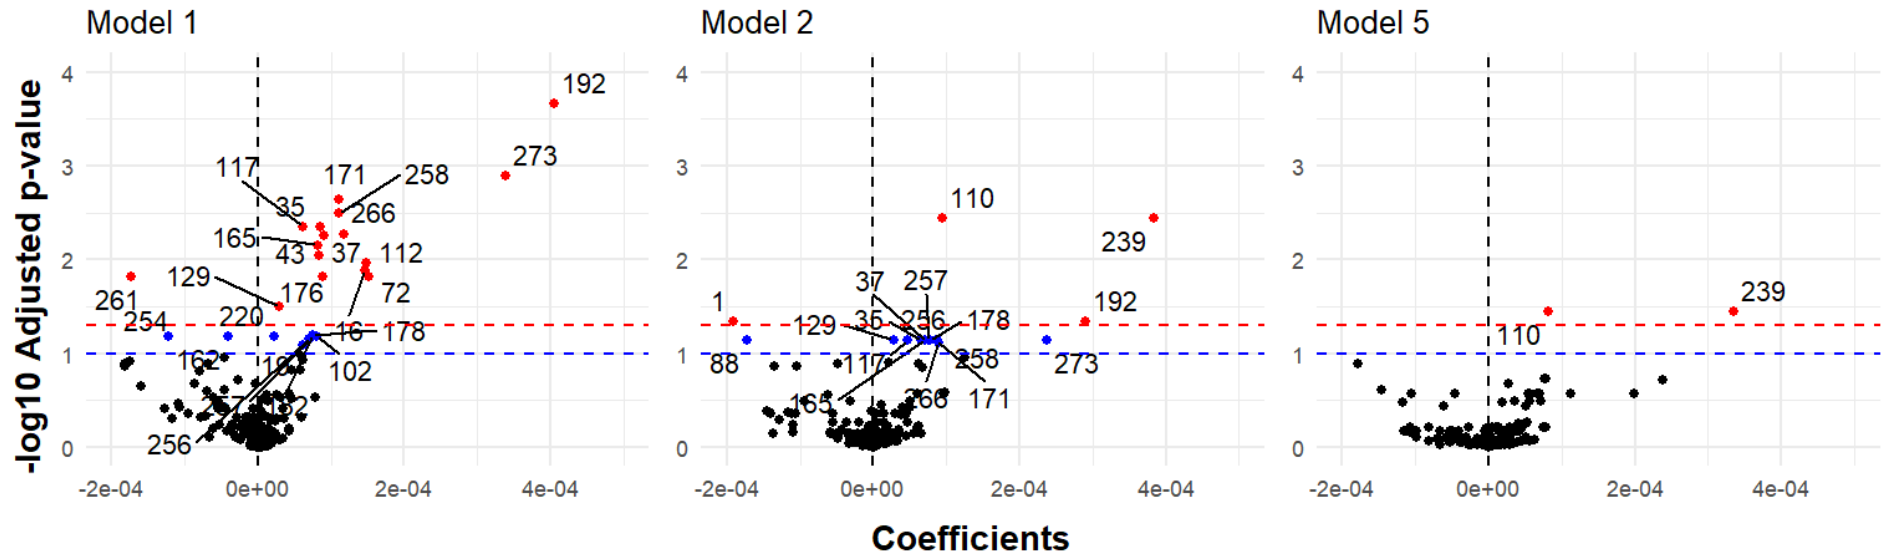

| <b>Pathway Number</b> | <b>Full Pathway Name</b>                                                           |
|-----------------------|------------------------------------------------------------------------------------|
| 1                     | X1CMET2.PWY..N10.formyl.tetrahydrofolate.biosynthesis                              |
| 16                    | BRANCHED.CHAIN.AA.SYN.PWY..superpathway.of.branched.amino.acid.biosynthesis        |
| 35                    | GALACT.GLUCUROCAT.PWY..superpathway.of.hexuronide.and.hexuronate.degradation       |
| 37                    | GALACTUROCAT.PWY..D.galacturonate.degradation.I                                    |
| 43                    | GLUCUROCAT.PWY..superpathway.of..beta..D.glucuronide.and.D.glucuronate.degradation |
| 67                    | METHGLYUT.PWY..superpathway.of.methylglyoxal.degradation                           |
| 72                    | NONOXIPENT.PWY..pentose.phosphate.pathway..non.oxidative.branch.                   |
| 88                    | PANTO.PWY..phosphopantothenate.biosynthesis.I                                      |
| 110                   | PWY.5100..pyruvate.fermentation.to.acetate.and.lactate.II                          |
| 112                   | PWY.5103..L.isoleucine.biosynthesis.III                                            |
| 117                   | PWY.5177..glutaryl.CoA.degradation                                                 |
| 126                   | PWY.5659..GDP.mannose.biosynthesis                                                 |
| 129                   | PWY.5676..acetyl.CoA.fermentation.to.butanoate.II                                  |
| 165                   | PWY.621..sucrose.degradation.III..sucrose.invertase.                               |
| 171                   | PWY.6317..galactose.degradation.I..Leloir.pathway.                                 |
| 176                   | PWY.6507..4.deoxy.L.threo.hex.4.enopyranuronate.degradation                        |
| 178                   | PWY.6545..pyrimidine.deoxyribonucleotides.de.novo.biosynthesis.III                 |
| 192                   | PWY.6737..starch.degradation.V                                                     |
| 226                   | PWY.7371..1.4.dihydroxy.6.naphthoate.biosynthesis.II                               |
| 239                   | PWY0.1296..purine.ribonucleosides.degradation                                      |
| 254                   | PWY0.845..superpathway.of.pyridoxal.5..phosphate.biosynthesis.and.salvage          |
| 256                   | PWY4FS.7..phosphatidylglycerol.biosynthesis.I..plastidic.                          |
| 257                   | PWY4FS.8..phosphatidylglycerol.biosynthesis.II..non.plastidic.                     |
| 258                   | PWY66.422..D.galactose.degradation.V..Leloir.pathway.                              |
| 261                   | PYRIDOXSYN.PWY..pyridoxal.5..phosphate.biosynthesis.I                              |
| 264                   | RIBOSYN2.PWY..flavin.biosynthesis.I..bacteria.and.plants.                          |
| 266                   | SER.GLYSYN.PWY..superpathway.of.L.serine.and.glycine.biosynthesis.I                |
| 273                   | TRNA.CHARGING.PWY..tRNA.charging                                                   |
